# Supplementary material
Source: publisher site journal article supplement (https://static.cambridge.org/content/id/urn:cambridge.org:id:article:S2059866120000357/resource/name/S2059866120000357supp001.docx)
Supplement: Supplementary file 1 [file S2059866120000357supp001.docx]

**Supplement – Additional Resources**

**Early Intervention Outcomes**

1. **Srihari VH, Tek C, Kucukgoncu S, Phutane VH, Breitborde NJ, et al**. First-episode services for psychotic disorders in the U.S. public sector: a pragmatic randomized controlled trial. Psychiatr. Serv 2015; 66(7):705–12

2. **Randall JR, Vokey S, Loewen H, Martens PJ, Brownell M, Katz A, Nickel NC, Burland E, Chateau D.** A systematic review of the effect of early interventions for psychosis on the usage of inpatient services. Schizophr. Bull 2015; 41(6): 1379-1386.

3. **Secher RG, Hjorthøj CR, Austin SF, Thorup A, Jeppesen P, et al**. Ten-year follow-up of the OPUS specialized early intervention trial for patients with a first episode of psychosis. Schizophr. Bull. 2015; 41(3):617– 26

4. **Chang WC, Chan GH, Jim OT, Lau ES, Hui CL, Chan SK**. Optimal duration of an early intervention programme for first-episode psychosis: randomised controlled trial. Br. J. Psychiatry 2015; 206(6):492–500

5. **Chang WC, Kwong VW, Lau ES, So HC, Wong CS**, et al. Sustainability of treatment effect of a 3-year early intervention programme for first-episode psychosis. Br. J. Psychiatry 2017; 211(1):37–44

6. **Malla A, Joober R, Iyer S, Norman R, Schmitz N, Brown T, Lutgens D, Jarvis E, Margolese HC, Casacalenda N, Abdel-Baki A, Latimer E, Mustafa S, Abadi S**. Comparing three-year extension of early intervention service to regular care following two years of early intervention service in first episode psychosis: a randomized single blind clinical trial. World Psychiatry 2017; 16: 278-286.

7. **Kane JM, Robinson DG, Schooler NR, Mueser KT, Penn DL, Rosenheck RA, Addington J, Brunette MF, Correll CU, Estroff SE, Marcy P, Robinson J, Meyer-Kalos PS, Gottlein JD, Glynn SM, Lynde DW, Pipes R, Kurian BT, Miller AL, Azrin ST, Goldstein AB, Severe JB, Lin H, Sint KJ, John M, Heinssen RK**. Comprehensive Versus Usual Community Care for First-Episode Psychosis: 2 Year Outcomes form the NIMH RAISE Early Treatment Program. Am J Psychiatry 2016; 173(4): 362-72.

8. **Rosenheck R, Leslie D, Lin H, Robinson DG, Schooler NR, Mueser KT, Penn DL, Addington J, Correll CU, Estroff SE, March P, Robinson J, Severe J, Rupp A, Schoenbaum M, Kane JM**. Cost-Effectiveness of Comprehensive, Integrated Care for First Episode Psychosis in the NIMH RAISE Early Treatment Program. Schizophrenia Bulletin 2016; 42(4): 896-906.

9. **Fusar-Poli P, McGorry PD, Kane JM**. Improving outcomes of first-episode psychosis: an overview. World Psychiatry 2017;16:251–65.

10. **Dixon LB, Goldman HH, Bennett ME, Wang Y, McNamara KA, Mendon SJ, Goldstein AB, Choi CW, Lee RJ, Lieberman JA, Essock SM.** Implementing Coordinated Specialty Care for Early Psychosis: The RAISE Connection Program. Psychiatric Services 2015: 66(7): 691-8.

11. **Nossel I, Wall MM, Scodes J, Marino LA, Zilkha S, Bello I, Malinovsky I, Lee R, Radigan M, Smith TE, Gu G, Dixon L**. Results of a Coordinated Specialty Care Program for Early Psychosis and Predictors of Outcomes. Psychiatric Services 2018; 69(8): 863-70.

12. **de Waal A, Dixon LB, Humensky JL**: Association of participant preferences on work and school participation after a first episode of psychosis. Early Interv Psychiatry. Early Intervention Psychiatry 2018; 12: (5) 959-963.

13. **Humensky JL, Essock SM, Dixon LB**: Characteristics associated with the pursuit of work and school among participants in a treatment program for first episode of psychosis. Psychiatric Rehabilitation Journal 2017; 40:108-112.

14. **Humensky JL, Nossel I, Bello I, Dixon LB.** Supported Education and Employment Services for Young People with Early Psychosis in OnTrackNY. The Journal of Mental Health Policy and Economics 2019; 22:95-108.

15. **Breitborde NJ, Bell EK, Dawley D, et al**. The Early Psychosis Intervention Center (EPICENTER): Development and six-month outcomes of an American first-episode psychosis clinical service. BMC Psychiatry 2015;15:266.

**Evidence-Basis for Components of Early Intervention Services**

1. **Sanger TM, Lieberman JA, Tohen M, et al**: Olanzapine versus haloperidol treatment in first-episode psychosis. American Journal of Psychiatry 1999; 156:79–87.

2. **Robinson DG, Woerner MG, Delman HM, et al**: Pharmacological treatments for first-episode schizophrenia. Schizophrenia Bulletin 2005; 31:705–722.

3. **Jackson H, McGorry P, Edwards J, et al**: A controlled trial of cognitively oriented psychotherapy for early psychosis (COPE) with four-year follow-up readmission data. Psychological Medicine 2005; 35:1295–1306.

4. **Lecomte T, Leclerc C, Corbière M, et al**: Group cognitive behavior therapy or social skills training for individuals with a recent onset of psychosis? Results of a randomized controlled trial. Journal of Nervous and Mental Disease 2008; 196:866–875.

5. **Lewis S, Tarrier N, Haddock G, et al**: Randomised, controlled trial of cognitive behavioural therapy in early schizophrenia: acute-phase outcomes. British Journal of Psychiatry 2002; 181(suppl 43):91–97.

6. **Wang C, Li Y, Zhao Z, et al**: Controlled study on long-term effect of cognitive behavior intervention on first episode schizophrenia. Chinese Mental Health Journal 2003;17:200–202.

7. **Goldstein MJ, Rodnick EH, Evans JR, et al**: Drug and family therapy in the aftercare of acute schizophrenics. Archives of General Psychiatry 1978; 35:1169–1177.

8. **Leavey G, Gulamhussein S, Papadopoulos C, et al**: A randomized controlled trial of a brief intervention for families of patients with a first episode of psychosis. Psychological Medicine 2004; 34:423–431.

9. **Zhang M, Wang M, Li J, et al**: Randomised-control trial of family intervention for 78 first-episode male schizophrenic patients: an 18-month study in Suzhou, Jiangsu. British Journal of Psychiatry 1994; 165:96–102.

10. **Killackey E, Allott K, Jackson HJ, Scutella R, Tseng YP, Borland J, Proffitt TM, Hunt S, Kay-Lambkin D, Chinnery G, Baksheev G, Alvarez-Jimenez M, McGorry PD, Cotton SM**. Individual Placement and Support for Vocational Recovery in First Episode Psychosis: Randomised Clinical Trial. Br J Psychiatry 2019; doi: 10.1192/bjp.2018.191.

11. **Bond GR, Drake RE, Luciano A**. Employment and Educational Outcomes in Early Intervention Programmes for Early Psychosis: A Systematic Review. Epidemiol Psychiatr Sci 2015; 24(5): 446-57.

12. **Drake RE, Xie H, Bond GR, McHugo GJ, Caton CL**. Early Psychosis and Employment. Schizophrenia Research 2013; 146(1-3): 111-7.

13. **Rosenheck R, Mueser KT, Sint K, Lin H, Lynde DW, Glynn SM, Robinson DG, Schooler NR, Marcy P, Mohamed S, Kane JM**. Supported Employment and Education in Comprehensive, Integrated Care for First Episode Psychosis: Effects on Work, School and Disability Income. Schizophrenia Research 2017; 182: 120-128.

14. **Rosenheck RA, Estroff SE, Sint K, Lin H, Mueser KT, Robinson DG, Schooler NR, Marcy P, Kane JM**, RAISE-ETP Investigators. Incomes and Outcomes: Social Security Disability Benefits in First-Episode Psychosis. Am J Psychiatry 2017; 174(9): 886-894.

15. **Monson K, Thurley M**. Consumer Participation in a Youth Mental Health Service. Early Intervention in Psychiatry 2011; 5(4): 381-8.

16. **Lecardeur L, Meunier-Cussac, Dolfus**. Mobile Intensive Care Unit: A case management team dedicated to early psychosis in France. Early Intervention in Psychiatry 2018, 12(5): 995-999.

17. **Tindall R, Francey S, Hamilton B**. Factors influencing engagement with case managers: Perspectives of young people with a diagnosis of first episode psychosis. Int J Mental Health Nursing 2015; 24(4): 295-303.

18. **Nossel I, Wall MM, Scodes J, Marino LA, Zilkha S, Bello I, Malinovsky I, Lee R, Radigan M, Smith TE, Gu G, Dixon L**. Results of a Coordinated Specialty Care Program for Early Psychosis and Predictors of Outcomes. Psychiatric Services 2018; 69(8): 863-70.

**Community-Based Participatory Research**

1. **Jones, N., Harrison, J., Aguiar, R., & Munro, L.** Transforming research for transformative change in mental health: Towards the future. *G., Nelson, B., Kloos, J. Ornelas,(Eds.), Community psychology and community mental health*, 2014; 351-372.
2. **Jones, N.** *Peer involvement & leadership in early intervention for psychosis: From planning to evaluation*. National Association of State Mental Health Program Directors. Technical Assistance Material Developed for SAMHSA/CMHS under Contract Reference: HHSS283201200002I. 2015.
3. **Jones, N., Kelly, T. & Ostrow, L**. *Promoting engagement in peer evaluation and research*. White paper and cases studies in participatory research and capacity building developed under a grant from the Substance Abuse and Mental Health Administration (SAMHSA). Lived Experience Research Network. 2014.
4. **Kalathil, J. & Jones, N**. Unsettling disciplines: Madness, knowledge, research. Introduction to a special issue entitled “Theoretical underpinnings of service user involvement in research.” (Ed. Kalathil J and Jones N). *Philosophy, Psychiatry & Psychology 2017*.
5. **Currier, G. & Jones, N.** *PathED Collaborative: Building A Tampa Bay Behavioral Health Pathway to Care PCOR/CER Network.* Staekholder Engagement Award funded by the Patient Centered Outcomes Research Institute. 2018.
6. **Happell B, Roper C**. Consumer Participation in Mental Health Research: Articulating a Model to Guide Practice. Australasian Psychiatry 2007; 15(3): 237-241.
7. **Jones L, Wells K**. Strategies for academic and clinician engagement in community-participatory partnered research. *JAMA* 2007; 297:407–10
8. **Israel AB, Schulz AJ, Parker EA, Becker AB**. Review of community-based research: assessing partnership approaches to improve public health. Annual Review of Public Health 1998; 19, 173-202.
9. **Boyer AP, Fair AM, Joosten YA, Dolor RJ, Williams NA, Sherden L, Stallings S, Smoot DT, Wilkins CH**. A Multilevel Approach to Stakeholder Engagement in the Formulation of a Clinical Data Research Network. Med Care. 2018 Oct;56 Suppl 10 Suppl 1:S22-S26. doi: 10.1097/MLR.0000000000000778. PubMed PMID: 30074947; PubMed Central PMCID: PMC6136953.
10. **Nilsen, P**. Making sense of implementation theories, models and frameworks. *Implementation Sci* 2015; 10:53.
11. **Field B, Booth A, Ilott I, Gerrish K**. Using the Knowledge to Action Framework in practice: a citation analysis and systematic review. Implement Sci. 2014; 9:172.
